# Supplementary material
Source: PubMed Central journal article supplement (PMC7071026)
Supplement: Supp_TableS1-S2.pdf [file Supp_TableS1-S2.pdf]

# Supplementary Material

SUPPLEMENTARY TABLE S1. DWI SINGLE-AXIS DIFFUSION DIRECTIONS

| No. | DW vectors |                |                | b-values   |                |                |
|-----|------------|----------------|----------------|------------|----------------|----------------|
|     | Left-right | Dorsal-ventral | Rostral-caudal | Left-right | Dorsal-ventral | Rostral-caudal |
| 1   | 0.000      | 0.000          | 0.000          | 0          | 0              | 0              |
| 2   | 0.000      | 0.000          | 0.000          | 0          | 0              | 0              |
| 3   | 0.000      | 0.000          | 0.000          | 0          | 0              | 0              |
| 4   | 0.258      | 0.000          | 0.000          | 200        | 0              | 0              |
| 5   | 0.408      | 0.000          | 0.000          | 500        | 0              | 0              |
| 6   | 0.577      | 0.000          | 0.000          | 1000       | 0              | 0              |
| 7   | 0.816      | 0.000          | 0.000          | 2000       | 0              | 0              |
| 8   | 0.816      | 0.000          | 0.289          | 2000       | 0              | 250            |
| 9   | 0.816      | 0.000          | 0.408          | 2000       | 0              | 500            |
| 10  | 0.816      | 0.000          | 0.500          | 2000       | 0              | 750            |
| 11  | 0.816      | 0.000          | 0.577          | 2000       | 0              | 1000           |
| 12  | 0.816      | 0.000          | 0.000          | 2000       | 0              | 0              |
| 13  | 0.816      | 0.000          | -0.289         | 2000       | 0              | 250            |
| 14  | 0.816      | 0.000          | -0.408         | 2000       | 0              | 500            |
| 15  | 0.816      | 0.000          | -0.500         | 2000       | 0              | 750            |
| 16  | 0.816      | 0.000          | -0.577         | 2000       | 0              | 1000           |
| 17  | -0.258     | 0.000          | 0.000          | 200        | 0              | 0              |
| 18  | -0.408     | 0.000          | 0.000          | 500        | 0              | 0              |
| 19  | -0.577     | 0.000          | 0.000          | 1000       | 0              | 0              |
| 20  | -0.816     | 0.000          | 0.000          | 2000       | 0              | 0              |
| 21  | -0.816     | 0.000          | 0.289          | 2000       | 0              | 250            |
| 22  | -0.816     | 0.000          | 0.408          | 2000       | 0              | 500            |
| 23  | -0.816     | 0.000          | 0.500          | 2000       | 0              | 750            |
| 24  | -0.816     | 0.000          | 0.577          | 2000       | 0              | 1000           |
| 25  | -0.816     | 0.000          | 0.000          | 2000       | 0              | 0              |
| 26  | -0.816     | 0.000          | -0.289         | 2000       | 0              | 250            |
| 27  | -0.816     | 0.000          | -0.408         | 2000       | 0              | 500            |
| 28  | -0.816     | 0.000          | -0.500         | 2000       | 0              | 750            |
| 29  | -0.816     | 0.000          | -0.577         | 2000       | 0              | 1000           |

Only directions with left-right b-value=2000 are used to estimate  $fADC_{||}$ ; only directions with rostral-caudal b-values=0 are used for estimation of AWF.

AWF, axonal water fraction; DWI, diffusion-weighted imaging; DW, diffusion-weighted;  $fADC_{||}$ , “filtered” parallel diffusivity from imaged-based DDE; AWF, axonal water fraction.

SUPPLEMENTARY TABLE S2. DDE-PRESS DIFFUSION DIRECTIONS

| No. | DW1        |                |                |         | DW2        |                |                |         |
|-----|------------|----------------|----------------|---------|------------|----------------|----------------|---------|
|     | Left-Right | Dorsal-Ventral | Rostral-Caudal | b-value | Left-Right | Dorsal-Ventral | Rostral-Caudal | b-value |
| 1   | 0.000      | 0.000          | 0.000          | 0       | 0.000      | 0.000          | 0.000          | 0       |
| 2   | 1.000      | 0.000          | 0.000          | 2000    | 0.000      | 0.000          | 0.000          | 0       |
| 3   | 1.000      | 0.000          | 0.000          | 2000    | 0.000      | 0.000          | 0.354          | 250     |
| 4   | 1.000      | 0.000          | 0.000          | 2000    | 0.000      | 0.000          | 0.500          | 500     |
| 5   | 1.000      | 0.000          | 0.000          | 2000    | 0.000      | 0.000          | 0.612          | 750     |
| 6   | 1.000      | 0.000          | 0.000          | 2000    | 0.000      | 0.000          | 0.707          | 1000    |
| 7   | 1.000      | 0.000          | 0.000          | 2000    | 0.000      | 0.000          | 0.791          | 1250    |
| 8   | 1.000      | 0.000          | 0.000          | 2000    | 0.000      | 0.000          | 0.866          | 1500    |
| 9   | 1.000      | 0.000          | 0.000          | 2000    | 0.000      | 0.000          | 0.935          | 1750    |
| 10  | 1.000      | 0.000          | 0.000          | 2000    | 0.000      | 0.000          | 1.000          | 2000    |

Only DW directions with DW1 b-value=2000 are used to estimate  $fADC_{||}$ .

DDE, double-diffusion encoding; dpi, days post-injury; DW, diffusion-weighted;  $fADC_{||}$ , “filtered” parallel diffusivity from imaged-based DDE; PRESS, point-resolved single-voxel spectroscopy.
